# Supplementary material
Source: publisher figshare collection journal article supplement (https://acs.figshare.com/ndownloader/files/22779953)
Supplement: Supplementary file 1 [file 22779953]

Compound_ID	SMILES	MCF-7 IC50(¦ÌM)	MDA-MB-231 IC50(¦ÌM)	A549 IC50(¦ÌM)	HeLa IC50(¦ÌM)	HUVEC IC50(¦ÌM)
MT	CC(NCCC1=CNC2=C1C=C(OC)C=C2)=O	16.49 ¡À 0.91	59.32 ¡À 2.12	60.04 ¡À 24.19	60.27 ¡À 1.71	>100
1	[OH]C(CCC(N1C(C=CC(OC)=C2)=C2C(CCNC(C)=O)=C1)=[O])=[O]	12.57 ¡À 5.03	88.55 ¡À 11.94	63.58 ¡À 4.53	49.28 ¡À 2.19	>100
2	CC(NCCC1=CN(C(CCCC(O)=O)=O)C2=C1C=C(OC)C=C2)=O	12.30 ¡À 0.29	107.34 ¡À 16.84	70.69 ¡À 10.71	44.72 ¡À 0.95	>100
3	[OH][Pt]([Cl])([O]C(CCC(N1C(C=CC(OC)=C2)=C2C(CCNC(C)=O)=C1)=[O])=[O])([Cl])([NH3])[NH3]	0.06 ¡À 0.01	0.36 ¡À 0.11	0.06 ¡À 0.01	0.06 ¡À 0.03	1.35 ¡À 0.82
4	[OH][Pt]([Cl])([Cl])([NH3])(OC(CCCC(N1C(C=CC(OC)=C2)=C2C(CCNC(C)=O)=C1)=O)=O)[NH3]	0.16 ¡À 0.07	0.50 ¡À 0.01	0.09 ¡À 0.04	0.15 ¡À 0.06	1.12 ¡À 0.31
5	[NH3][Pt]([O]C(CCC(N1C(C=CC(OC)=C2)=C2C(CCNC(C)=O)=C1)=[O])=[O])([Cl])([NH3])([O]C(CCC(N3C(C=CC(OC)=C4)=C4C(CCNC(C)=O)=C3)=[O])=[O])[Cl]	5.80 ¡À 0.39	65.62 ¡À 1.19	13.63 ¡À 4.45	6.46 ¡À 0.45	12.05 ¡À 1.32
6	[NH3][Pt]([Cl])([NH3])(OC(CCCC(N1C(C=CC(OC)=C2)=C2C(CCNC(C)=O)=C1)=O)=O)(OC(CCCC(N3C(C=CC(OC)=C4)=C4C(CCNC(C)=O)=C3)=O)=O)[Cl]	2.23 ¡À 0.78	12.26 ¡À 0.13	18.56 ¡À 3.81	6.52 ¡À 3.64	9.38 ¡À 0.41
CDDP	[NH3][Pt](Cl)([NH3])Cl	5.93 ¡À 0.40	11.68 ¡À 0.06	3.81 ¡À 0.19	4.94 ¡À 0.31	2.73 ¡À 0.77
Oxoplatin	O[Pt](Cl)(O)(Cl)([NH3])[NH3]	10.86 ¡À 2.17	33.83 ¡À 7.91	43.28 ¡À 1.48	21.32 ¡À 7.14	43.62 ¡À 5.19
Satraplatin	[NH3][Pt](Cl)(OC(C)=O)(Cl)([NH2]C1CCCCC1)OC(C)=O	1.75 ¡À 0.34	1.64 ¡À 0.07	1.50 ¡À 0.19	0.47 ¡À 0.20	2.41 ¡À 0.13
